# Supplementary material for: Protocol for a phase 3 trial to evaluate the effectiveness and safety of a heterologous, two-dose vaccine for Ebola virus disease in the Democratic Republic of the Congo
Source: HighWire-hosted journal article supplement (doi:10.1136/bmjopen-2021-055596), 2022-03-01
Supplement: bmjopen-2021-055596supp012_data_supplement.pdf [file bmjopen-2021-055596supp012_data_supplement.pdf]

**Protocol for a phase 3 trial to evaluate the effectiveness and safety of a heterologous, two-dose vaccine for Ebola virus disease in the Democratic Republic of the Congo**

**Appendix 7**

**Sponsor and Funders Responsibilities**

Funders CEPI, Wellcome and DFID advised on the study design and protocol.

|                                   | Sponsor | Funders |
|-----------------------------------|---------|---------|
| Study design                      | A/R     | R       |
| Data collection                   | A/R     | I       |
| Data management                   | A/R     | I       |
| Data analysis                     | A/R     | I       |
| Data interpretation               | A/R     | I       |
| Report writing                    | A/R     | C       |
| Report submission for publication | A/R     | C       |

A = Accountable

R = Responsible

C = Contributing

I = Informed
